# Supplementary material for: Scalable exfoliation for large-size boron nitride nanosheets by low temperature thermal expansion-assisted ultrasonic exfoliation
Source: Royal Society of Chemistry journal article supplement (doi:10.1039/c7tc01692a), 2017-01-01
Supplement: c7tc01692a1.pdf [file c7tc01692a1.pdf]

## Supporting Information

### **Scalable Exfoliation for Large-Size Boron Nitride Nanosheets by Thermal Expansion-Assisted Ultrasonic Exfoliation**

*Feng Yuan,<sup>1</sup> Weicheng Jiao,<sup>1,\*</sup> Fan Yang,<sup>1</sup> Wenbo Liu,<sup>2</sup> Jiayin Liu,<sup>1</sup> Zhonghai Xu<sup>1</sup> and  
Rongguo Wang,<sup>1,\*</sup>*

*<sup>1</sup>Science and Technology on Advanced Composites in Special Environments Laboratory,  
Harbin Institute of Technology, Harbin 150086, China*

*<sup>2</sup>School of Materials Science and Engineering, Harbin Institute of Technology, Harbin,  
150001, China.*

## Preparation of BN-OH

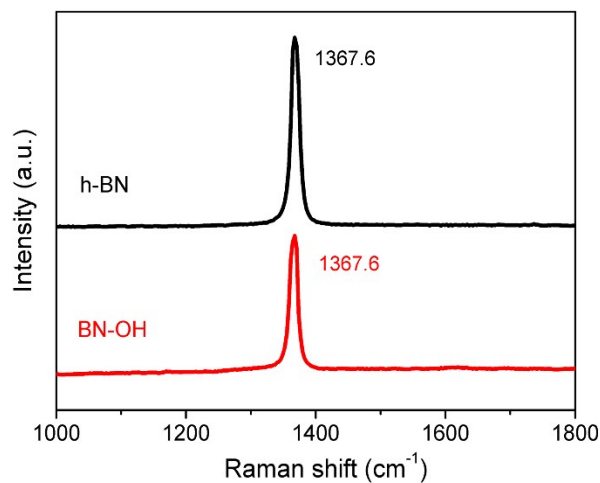

**Fig. S1** Raman spectra of the pristine h-BN and BN-OH

Raman spectra of the h-BN and BN-OH both show a dominant peak at  $1367.6\text{ cm}^{-1}$ , which is related to the high frequency  $E_{2g}$  mode (Fig. S1). Compared with the Raman spectrum of pristine h-BN, the BN-OH has no new features, suggesting that the alkaline treatment process brings no damage to the hexagonal structure.<sup>1</sup>

## H<sub>2</sub> induced low temperature thermal expansion of BN-OH

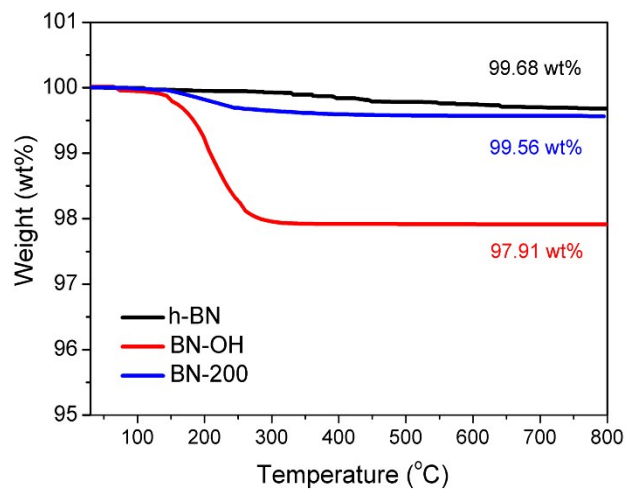

**Fig. S2** TGA curves of the raw h-BN, BN-OH and BN-200 under nitrogen atmosphere with a heating speed of 10 °C min<sup>-1</sup>.

Fig. S2 shows the TGA curves of the raw h-BN, BN-OH and BN-200, it observes that the BN-200 exhibits significantly improved thermal stability as compared to BN-OH, and the mass loss is only 0.44% at 800 °C, which is comparable to the value of the pristine h-BN (0.32% at 800 °C), but much lower than 2.09 % for BN-OH at 800 °C. This further confirms the occurrence of thermal reduction of BN-OH during the H<sub>2</sub>-assisted low temperature thermal treatment.

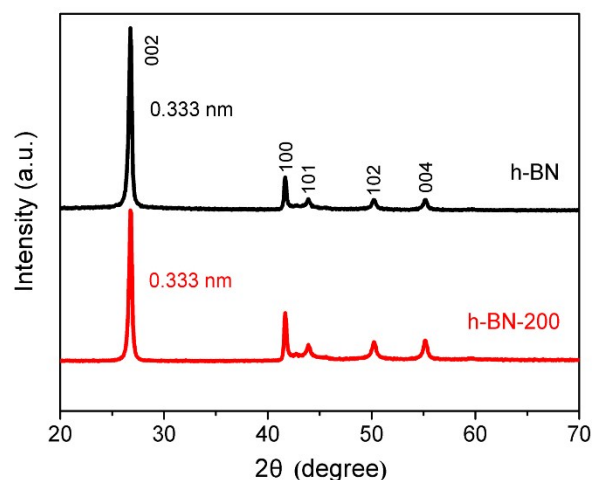

**Fig. S3** XRD patterns of the pristine h-BN and the sample (h-BN-200) left after the direct thermal treatment of pristine h-BN powders.

For comparison, the raw h-BN powders were also subjected to thermal treatment according to the process done to BN-OH. It can be seen that the XRD spectrum of h-BN-200 matches well with that of the pristine h-BN, and the (002) plane peak shows no any shift, suggesting that the h-BN-200 fails to be expanded during  $H_2$  assisted low temperature thermal treatment.

## Preparation of BNNS by sonication

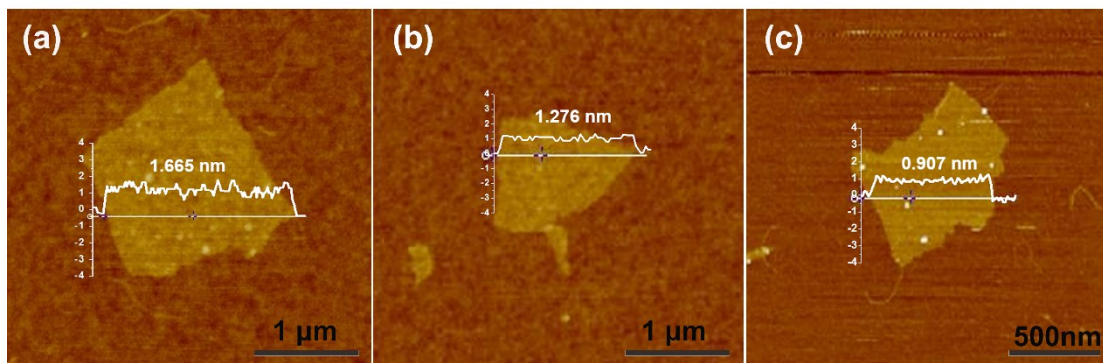

**Fig. S4 (a-c)** AFM topography images and the corresponding height of BNNSs with different atomic layers **(a)** a BNNS with three layers. **(b)** a BNNS with two layers. **(c)** a mono-layer BNNS.

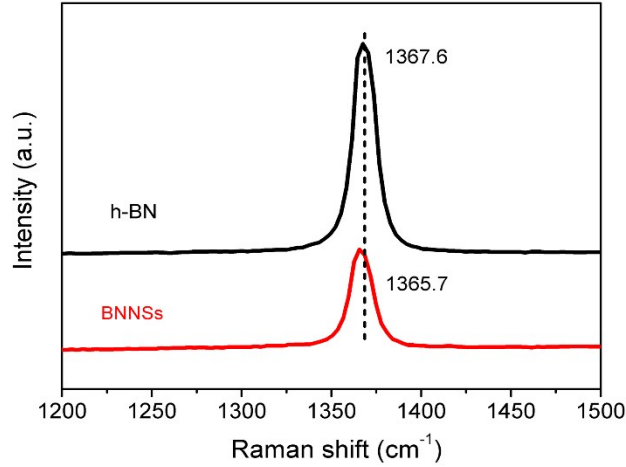

**Fig. S5** Raman spectra of the pristine h-BN and BNNSs.

The Raman spectrum of the bulk h-BN shows a peak at  $1367.6 \text{ cm}^{-1}$ , which corresponds to the  $E_{2g}$  phonon mode (Fig. S5). The peak of  $E_{2g}$  phonon mode can show a red shift or blue shift when the number of layer decreases.<sup>2</sup> For bilayers or few layers, a red shift can be observed, since the B-N bonds can be slightly elongated to soften the phonon mode. Whereas, for monolayer, the peak will show a blue shift of  $2\text{-}4 \text{ cm}^{-1}$ , which is attributed to the hardening of the phonon mode caused by a slightly shorter B-N bond. As can be seen, the resultant BNNSs show the  $E_{2g}$  phonon mode at  $1365.5 \text{ cm}^{-1}$ , corresponding to a red shift of  $\sim 2 \text{ cm}^{-1}$ . The results reveal the successful preparation of few-layer BNNSs.

## The yield of BNNSs

In order to demonstrate that the precipitate removed by centrifugation is reusable, we firstly treated the precipitate with fresh NaOH solution, and then H<sub>2</sub>-induced thermal expansion and sonication once again under the same experimental conditions. After separation by centrifugation and vacuum drying, it was found that additional 0.12 g of bulk materials were peeled off to BNNSs, giving a yield of 6%. AFM result shows the successful exfoliation of few-layer BNNSs from the sediment, as shown in Fig.S6.

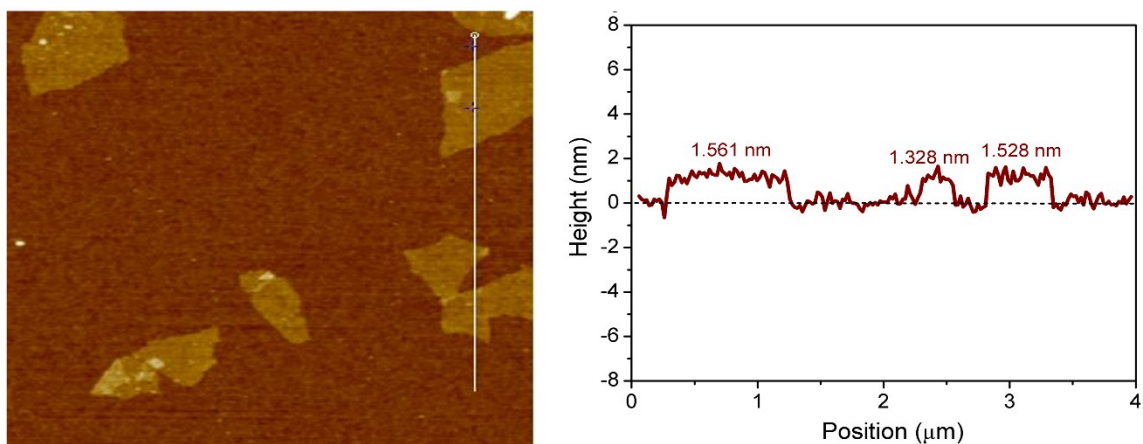

**Fig. S6** AFM image of the recycled BNNSs and the corresponding height profile along the line.

## Thermal conductivity of the TPU/BNNsS composites

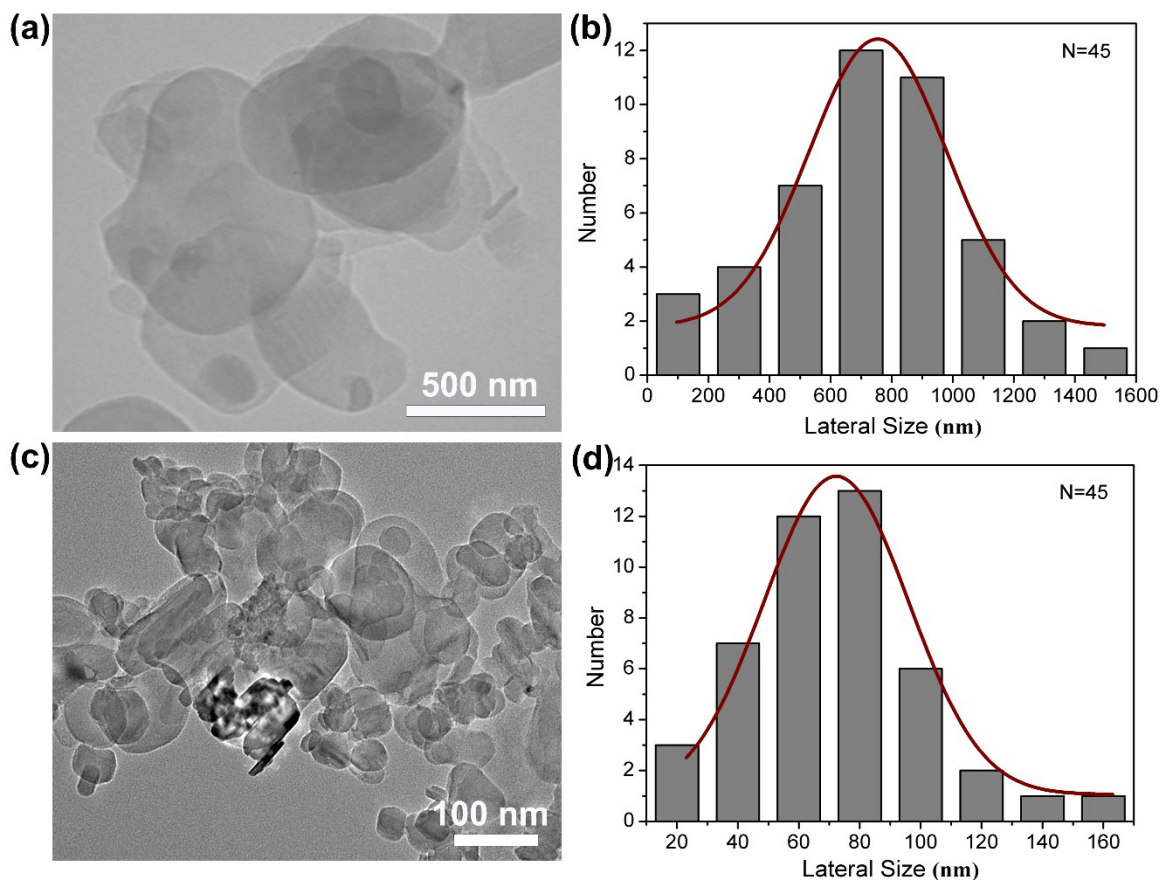

**Fig. S7 (a)** Low-magnification TEM image of BNNSs-2. **(b)** Statistical analyses on the lateral size over a sample set of 45 pieces of BNNSs-2. **(c)** Low-magnification TEM image of BNNSs-10. **(d)** Statistical analyses on the lateral size over a sample set of 45 pieces of BNNSs-10.

## Reference

1. R. J. Nemanich, S. A. Solin and R. M. Martin, *Physical Review B*, 1981, **23**, 6348-6356.
2. G. R. Bhimanapati, D. Kozuch and J. A. Robinson, *Nanoscale*, 2014, **6**, 11671-11675.
